# Supplementary material for: MOF-derived porous ZnO integrated with NiO and colloidal QDs for efficient hydrogen generation via a synergistic photoelectrochemical and electrochemical process
Source: Royal Society of Chemistry journal article supplement (doi:10.1039/d3ta01108a), 2023-01-01
Supplement: d3ta01108a1.pdf [file d3ta01108a1.pdf]

Electronic Supplementary Material (ESI) for Journal of Materials Chemistry A.

This journal is © The Royal Society of Chemistry 2023

**MOF Derivative Porous ZnO Integrated with NiO and Colloidal QDs  
for Efficient Hydrogen Generation via Synergistic  
Photoelectrochemical and Electrochemical Process**

Yi Tao,<sup>a</sup> Zikun Tang,<sup>a</sup> Yihong Zhong,<sup>a</sup> Dequan Bao,<sup>a</sup> Zhenqiu Gao,<sup>a</sup> Wei Zhao,<sup>a</sup> Zhen Wen,<sup>a</sup>

Hao Zhang,<sup>\*a</sup> Kanghong Wang<sup>\*ab</sup> and Xuhui Sun<sup>\*a</sup>

<sup>a</sup>Institute of Functional Nano & Soft Materials (FUNSOM), Jiangsu Key Laboratory for Carbon-Based Functional Materials & Devices, Jiangsu Key Laboratory of Advanced Negative Carbon Technologies, Soochow University, 199 Ren-ai Road, Suzhou, 215123, Jiangsu, China.

<sup>b</sup>Suzhou Institute for Advanced Research, University of Science and Technology of China, Suzhou, Jiangsu 215123, China.

\* Corresponding authors: haozhang@suda.edu.cn (H. Zhang), kanghongwang@ustc.edu.cn (K. Wang), xhsun@suda.edu.cn (X. Sun)

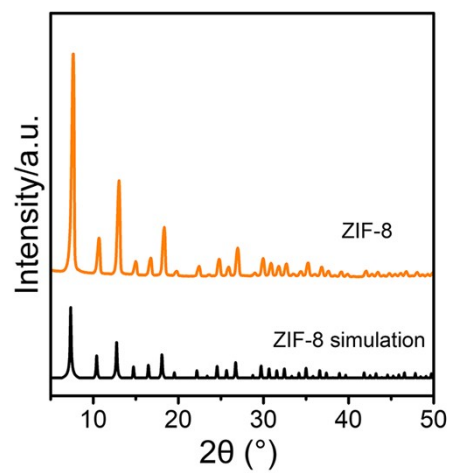

**Fig. S1** XRD patterns of as-synthesized ZIF-8.

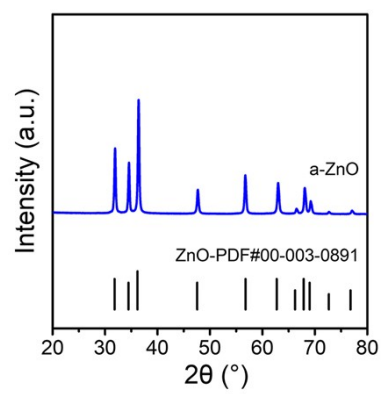

**Fig. S2** XRD patterns of MOF derivative a-ZnO.

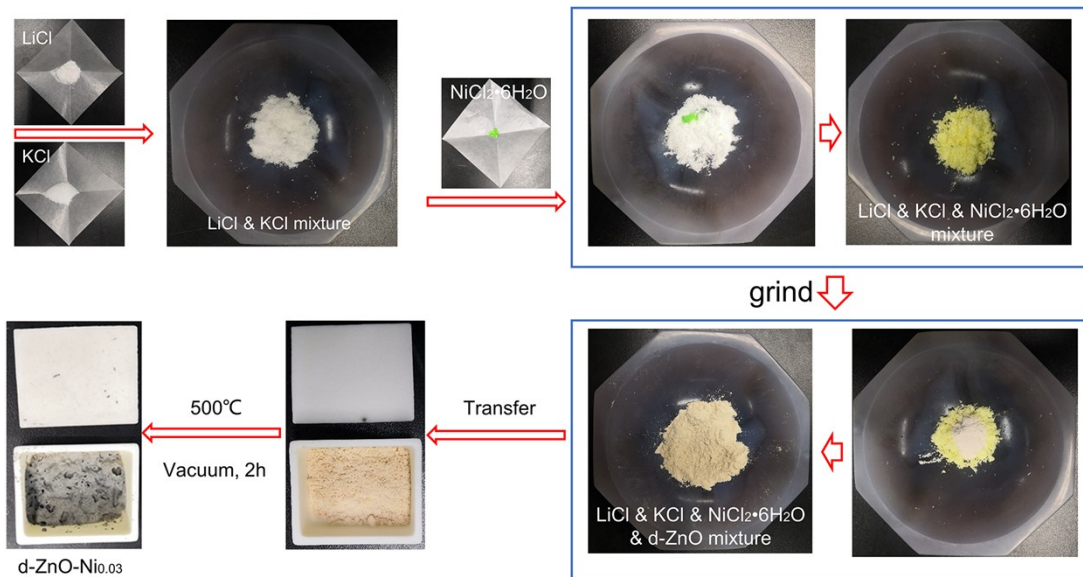

**Fig. S3** The photos of the mixture of  $\text{NiCl}_2 \cdot 6\text{H}_2\text{O}$ ,  $\text{LiCl}$ , and  $\text{KCl}$  at different stages of the MSM process.

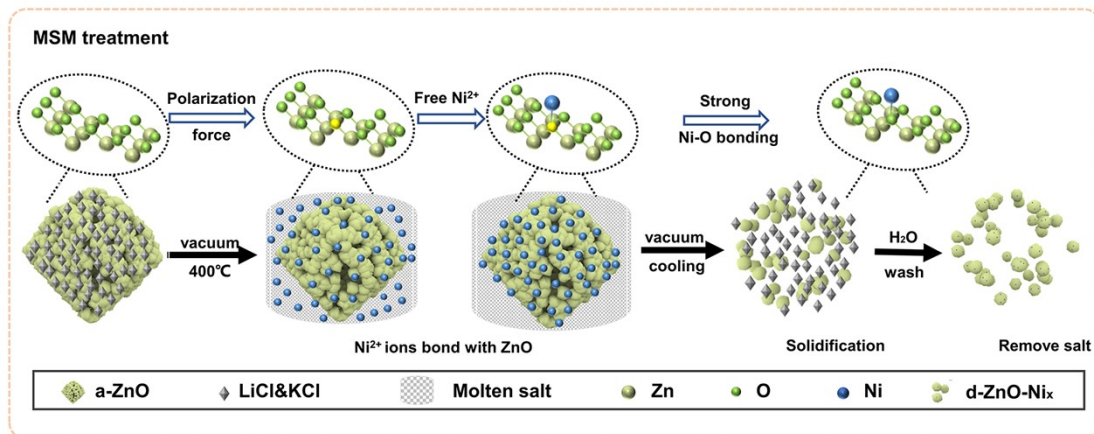

**Fig. S4** Illustration of molten-salt-mediated (MSM) preparation of d-ZnO-Ni.

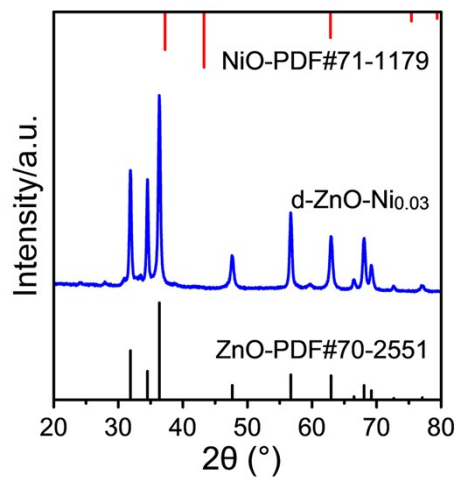

**Fig. S5** XRD patterns of MOF derivative d-ZnO-Ni<sub>0.03</sub>.

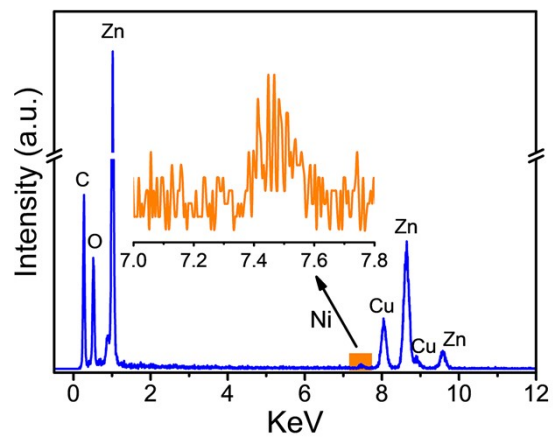

**Fig. S6** EDX spectrum of d-ZnO@NiO<sub>0.03</sub>.

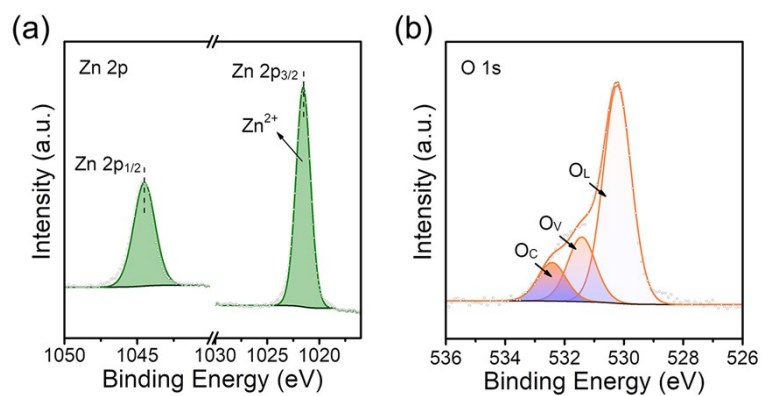

**Fig. S7** High-resolution XPS spectra of d-ZnO@NiO<sub>0.03</sub>: (a) Zn 2p, (b) O 1s.



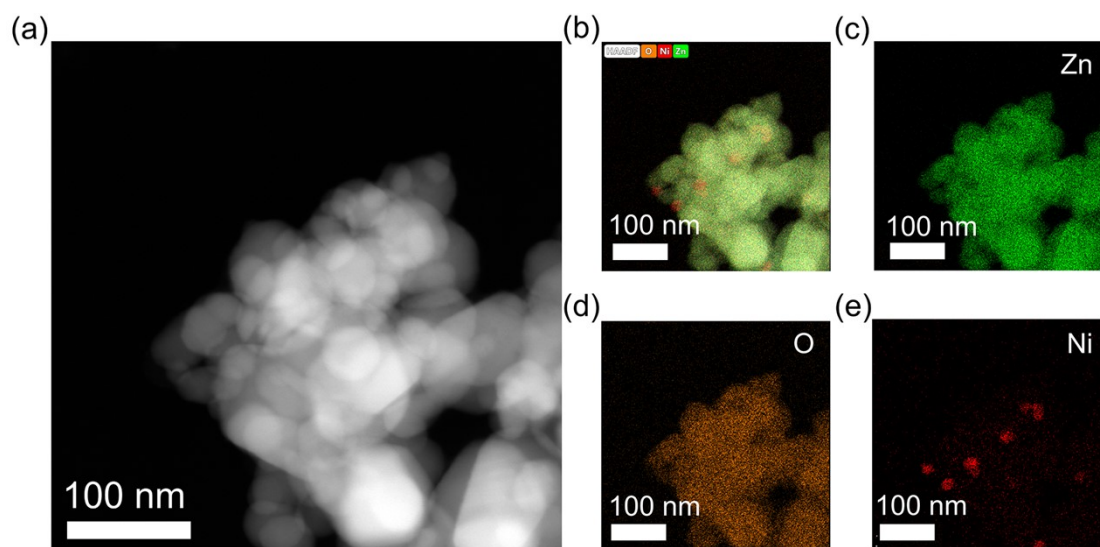

**Fig. S8** Representative HAADF image (a) of d-ZnO@NiO<sub>0.06</sub> and related EDX mapping of (b) comprehensive image, (c) Zn, (d) O, (e) Ni.

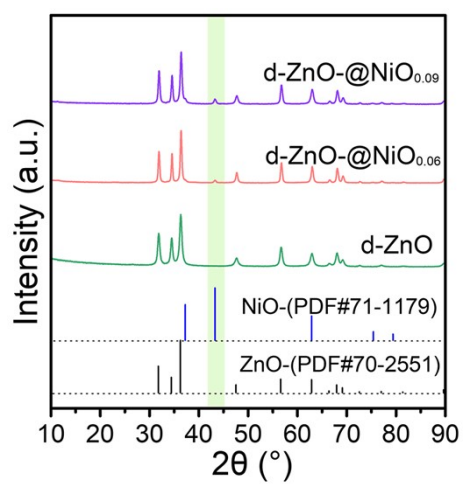

**Fig. S9** XRD patterns of d-ZnO, d-ZnO@NiO<sub>0.06</sub>, and d-ZnO@NiO<sub>0.09</sub>.

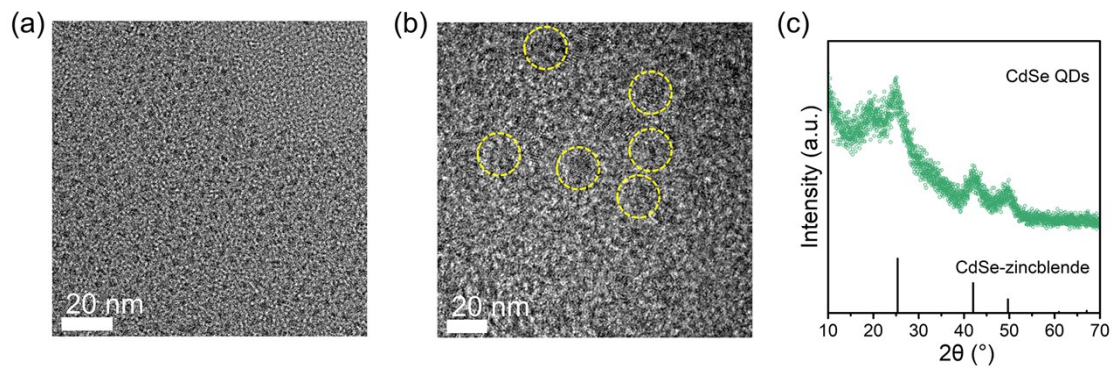

**Fig. S10** (a) Representative TEM image of CdSe QDs. (b) HRTEM of CdSe QDs. (c) XRD patterns of CdSe QDs.

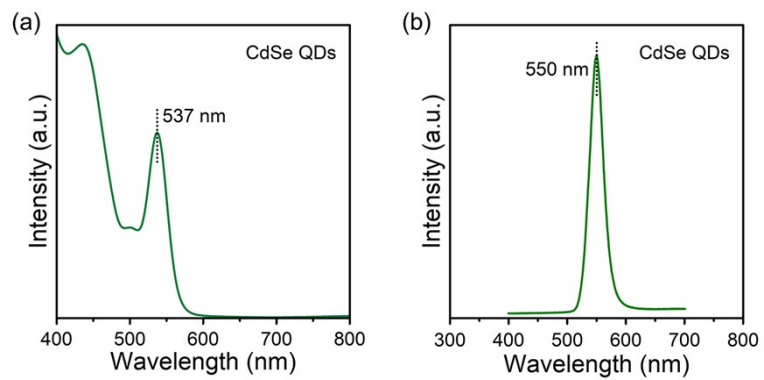

**Fig. S11** (a) UV-Vis absorption spectrum and (b) PL spectrum of CdSe QDs in toluene.

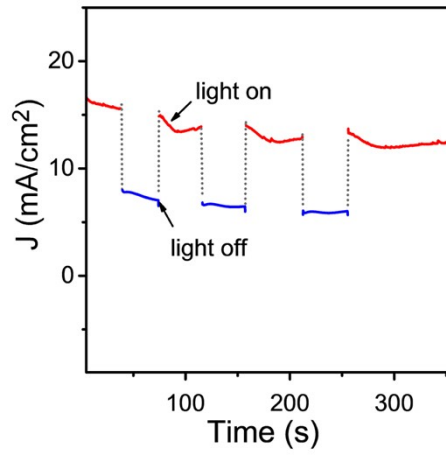

**Fig. S12** Current density-time under chopped illumination.

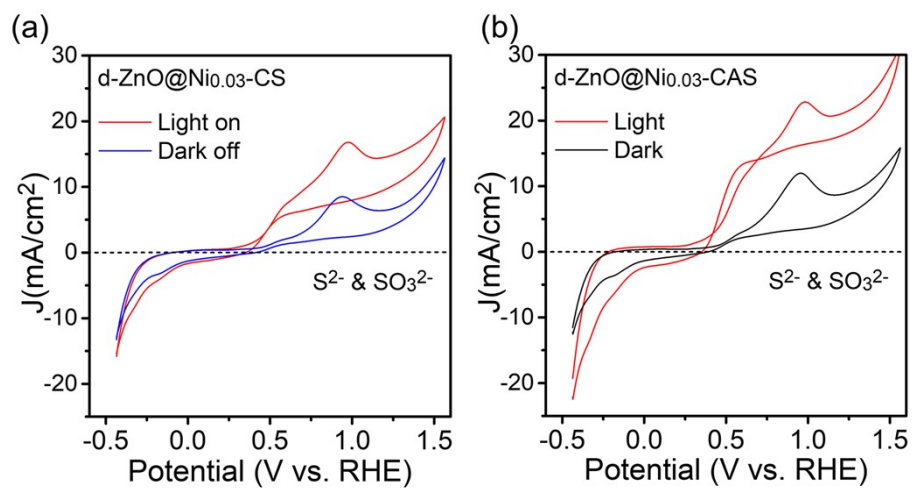

**Fig. S13** Cyclic voltammetry (CV) curves of (a) d-ZnO@NiO<sub>0.03</sub>-CS and (b) d-ZnO@NiO<sub>0.03</sub>-CAS in the S<sup>2-</sup> & SO<sub>3</sub><sup>2-</sup> electrolyte (pH ~ 13).

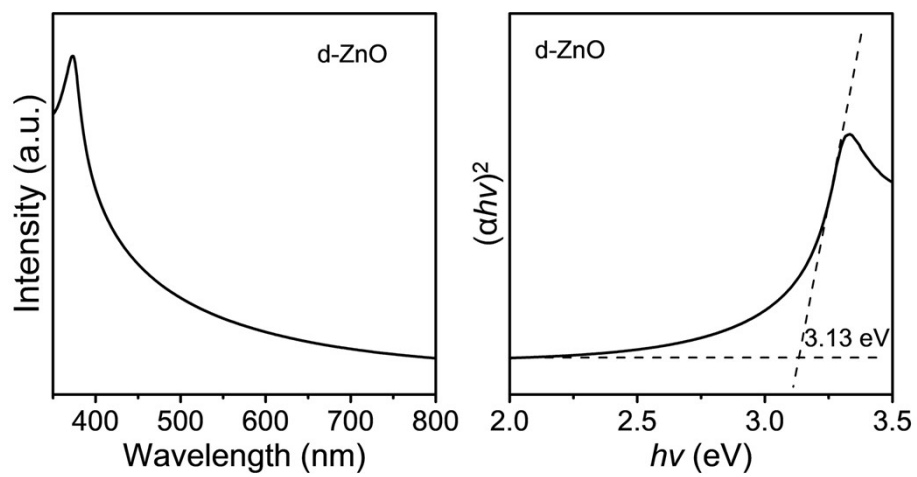

**Fig. S14** The UV-vis spectroscopy measurement and the related Tauc plot for d-ZnO.

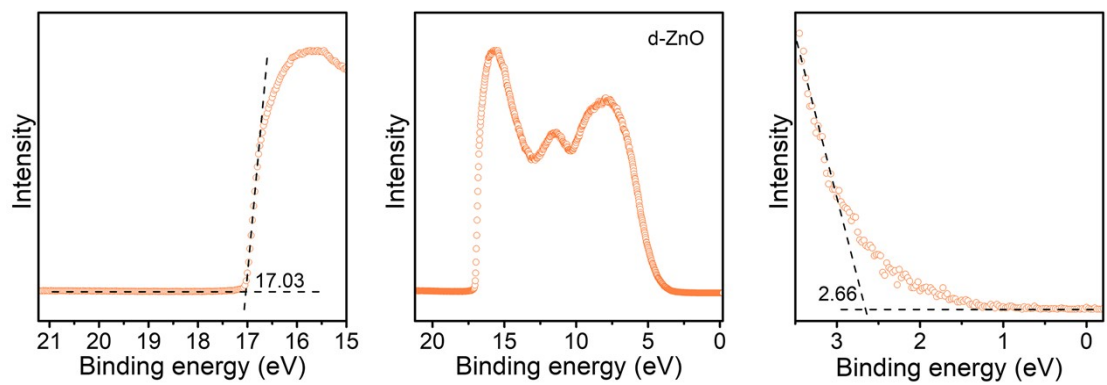

**Fig. S15** UPS measurement of d-ZnO: high binding energy cut-off (left); overall UPS spectrum (middle); low binding energy cut-off (right).



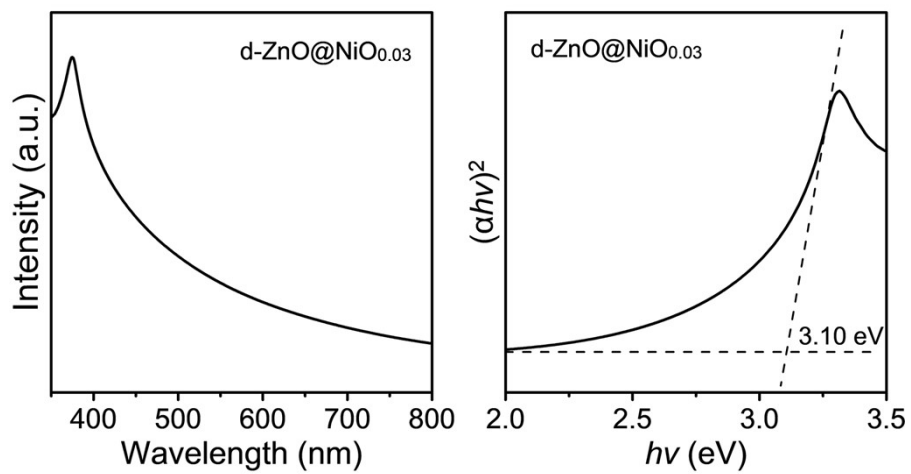

**Fig. S16** The UV-vis spectroscopy measurement and the related Tauc plot for d-ZnO@NiO<sub>0.03</sub>.

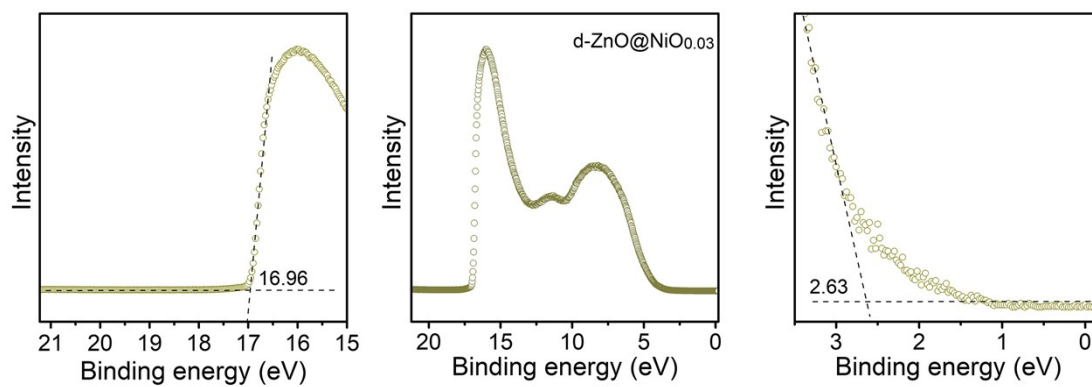

**Fig. S17** UPS measurement of d-ZnO@Ni<sub>0.03</sub>: high binding energy cut-off (left); overall UPS spectrum (middle); low binding energy cut-off (right).

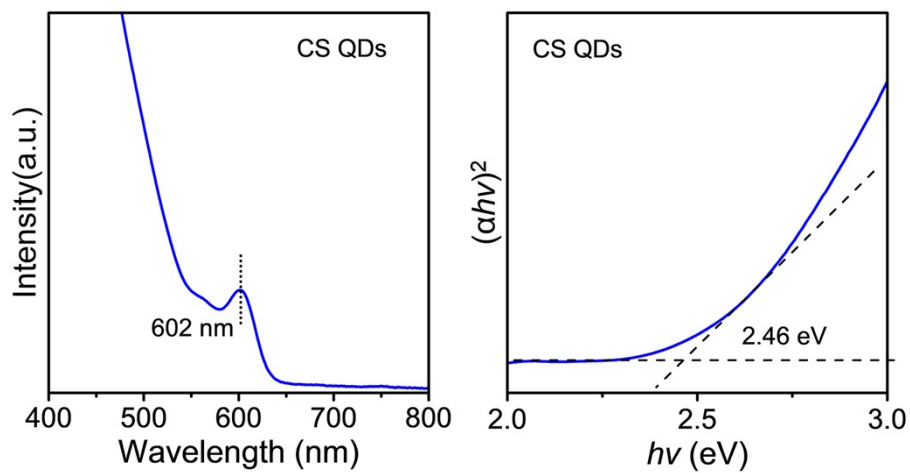

**Fig. S18** The UV-vis spectroscopy measurement and the related Tauc plot for CS QDs.

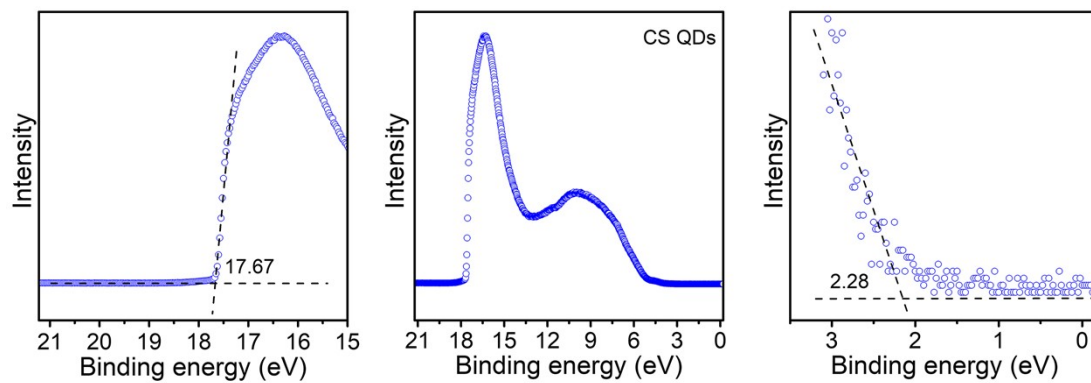

**Fig. S19** UPS measurement of CS QDs: high binding energy cut-off (left); overall UPS spectrum (middle); low binding energy cut-off (right).

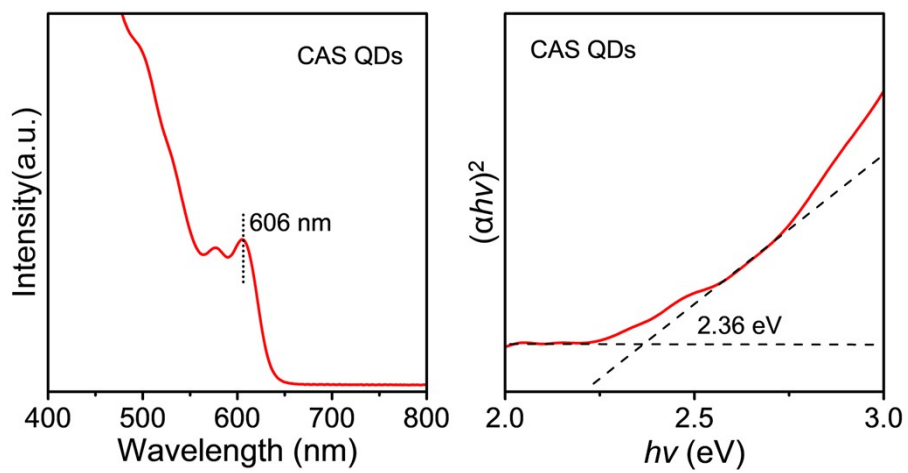

**Fig. S20** The UV-vis spectroscopy measurement and the related Tauc plot for CAS QDs.

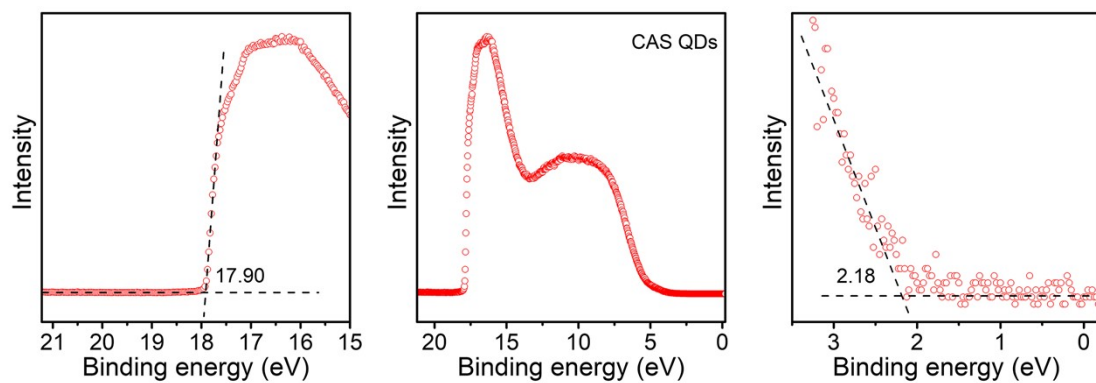

**Fig. S21** UPS measurement of CAS QDs: high binding energy cut-off (left); overall UPS spectrum (middle); low binding energy cut-off (right).

---

Table S1 The feeding ratio of Ni/Zn and ICP tests of d-ZnO@NiO<sub>x</sub>.

---

| Sample                    | Feeding ratio |            | ICP     |  |
|---------------------------|---------------|------------|---------|--|
|                           | Ni/Zn(at%)    | Ni/Zn(at%) | Ni(wt%) |  |
| d-ZnO@NiO <sub>0.03</sub> | 3             | 0.62       | 0.45    |  |
| d-ZnO@NiO <sub>0.06</sub> | 6             | 1.28       | 0.91    |  |
| d-ZnO@NiO <sub>0.09</sub> | 9             | 2.09       | 1.48    |  |

---

**Table S2** Comparison of saturated photocurrent density of PEC devices based on QDs in this work and the reported literature. The configuration of PEC cell is identical in all of devices.

| Photoanode structure                                              | QDs types     | $J$ (mA.cm <sup>-2</sup> ) | Ref.      |
|-------------------------------------------------------------------|---------------|----------------------------|-----------|
| d-ZnO@Ni <sub>0.03</sub> -CAS                                     | Colloidal     | 21.7                       | This work |
| d-ZnO@CAS                                                         | Colloidal     | 15.6                       | This work |
| d-ZnO@Ni <sub>0.03</sub> -CS                                      | Colloidal     | 14.9                       | This work |
| d-ZnO@CS                                                          | Colloidal     | 8.8                        | This work |
| ZnO/CdSe/CdS/IrO <sub>x</sub>                                     | Non-colloidal | 13.9                       | 1         |
| CdS/Ni(OH) <sub>2</sub> &Co(OH) <sub>2</sub>                      | Non-colloidal | 1.2                        | 2         |
| TiO <sub>2</sub> /CdSe/5CdSe <sub>0.5</sub> S <sub>0.5</sub> /CdS | Colloidal     | 12.0                       | 3         |
| m-TiO <sub>2</sub> /CdSe/(CdS) <sub>6</sub>                       | Colloidal     | 10.7                       | 4         |
| TiO <sub>2</sub> /CdSe/CdS                                        | Colloidal     | 10.0                       | 5         |
| H-TiO <sub>2</sub> -CdSe                                          | Non-colloidal | 16.2                       | 6         |
| TiO <sub>2</sub> /CdS/Zn <sub>y</sub> Cd <sub>1-y</sub> S/ZnS     | Colloidal     | 20.5                       | 7         |
| TiO <sub>2</sub> /PbS/CdS                                         | Colloidal     | 5.3                        | 8         |
| TiO <sub>2</sub> /CdSe/3Pb <sub>x</sub> Cd <sub>1-x</sub> S/3CdS  | Colloidal     | 6.0                        | 9         |
| TiO <sub>2</sub> /CdSe/5CdSe <sub>x</sub> S <sub>1-x</sub> /2CdS  | Colloidal     | 11.3                       | 10        |
| TiO <sub>2</sub> /CdSe/5CdSe <sub>x</sub> S <sub>1-x</sub> /CdS   | Colloidal     | 17.5                       | 11        |
| TiO <sub>2</sub> /CdS/(CdSe) <sub>6</sub>                         | Colloidal     | 16.0                       | 12        |



---

**Table S3** The  $R_s$  and  $R_{ct}$  for the d-ZnO-QDs, d-ZnO@NiO<sub>0.03</sub>-CS and d-ZnO@NiO<sub>0.03</sub>-CAS photoanodes.

| Sample                         | $R_s(\Omega)$ | $R_{ct}(\Omega)$ |
|--------------------------------|---------------|------------------|
| d-ZnO@CS                       | 41            | 776              |
| d-ZnO@NiO <sub>0.03</sub> -CS  | 39            | 367              |
| d-ZnO@NiO <sub>0.03</sub> -CAS | 42            | 272              |

---

**Table S4** Ratio of Se/S in the shell as a function of SILAR cycle.

---

|         | Shell | 1    | 2    | 3    | 4    | 5    | 6    |
|---------|-------|------|------|------|------|------|------|
| CS QD   | S     | 0/10 | 0/10 | 0/10 | 0/10 | 0/10 | 0/10 |
| CAS QDs | Se/S  | 8/2  | 6/4  | 4/6  | 2/8  | 0/10 | 0/10 |

---

---

## Reference

- 1 M. Seol, J. W. Jang, S. Cho, J. S. Lee and K. Yong, *Chem. Mater.*, 2013, **25**, 184-189.
- 2 A. Pareek, P. Paik and P. H. Borse, *Dalton Trans.*, 2016, **45**, 11120-11128.
- 3 H. Zhao, G. Liu, F. Vidal, Y. Wang and A. Vomiero, *Nano Energy*, 2018, **53**, 116-124.
- 4 L. Shi, D. Benetti, F. Li, Q. Wei and F. Rosei, *Appl. Catal. B: Environ.*, 2020, **263**, 118317.
- 5 R. Adhikari, L. Jin, F. Navarro-Pardo, D. Benetti, B. AlOtaibi, S. Vanka, H. Zhao, Z. Mi, A. Vomiero and F. Rosei, *Nano Energy*, 2016, **27**, 265-274.
- 6 K. Kim, M. J. Kim, S. I. Kim and J. H. Jang, *Sci. Rep.*, 2013, **3**, 3330.
- 7 K. Wang, Y. Tao, Z. Tang, D. Benetti, F. Vidal, H. Zhao, F. Rosei and X. Sun, *Nano Energy*, 2022, **100**, 107524.
- 8 L. Jin, G. Sirigu, X. Tong, A. Camellini, A. Parisini, G. Nicotra, C. Spinella, H. Zhao, S. Sun, V. Morandi, M. Zavelani-Rossi, F. Rosei and A. Vomiero, *Nano Energy*, 2016, **30**, 531-541.
- 9 R. Adhikari, K. Basu, Y. Zhou, F. Vetrone, D. Ma, S. Sun, F. Vidal, H. Zhao and F. Rosei, *J. Mater. Chem. A*, 2018, **6**, 6822-6829.
- 10 G. S. Selopal, M. Mohammadnezhad, F. Navarro-Pardo, F. Vidal, H. Zhao, Z. M. Wang and F. Rosei, *Nanoscale Horiz.*, 2019, **4**, 404-414.
- 11 K. Wang, X. Tong, Y. Zhou, H. Zhang, F. Navarro-Pardo, G. S. Selopal, G. Liu, J. Tang, Y. Wang, S. Sun, D. Ma, Z. M. Wang, F. Vidal, H. Zhao, X. Sun and F. Rosei, *J. Mater. Chem. A*, 2019, **7**, 14079-14088.
- 12 H. Zhang, L. V. Besteiro, J. Liu, C. Wang, G. S. Selopal, Z. Chen, D. Barba, Z. M. Wang, H. Zhao, G. P. Lopinski, S. Sun and F. Rosei, *Nano Energy*, 2021, **79**, 105416.
